# Supplementary material for: Solution-phase catalytic synthesis, characterization and growth kinetics of Ag2S–CdS matchstick-like heteronanostructures
Source: Royal Society of Chemistry journal article supplement (doi:10.1039/c3dt52693c), 2013-12-02
Supplement: c3dt52693c.pdf [file c3dt52693c.pdf]

## Electronic Supplementary Information (ESI)

### **Solution-phase catalytic synthesis, characterization and growth kinetics of Ag<sub>2</sub>S-CdS matchstick-like heteronanostructures**

Junli Wang,<sup>\*ab</sup> Hui Feng,<sup>a</sup> Kangmin Chen,<sup>c</sup> Weiling Fan<sup>a</sup> and Qing Yang<sup>\*b</sup>

<sup>a</sup>Functional Molecular Materials Research Centre, Scientific Research Academy & School of Chemistry and Chemical Engineering, Jiangsu University, Zhenjiang 212013, P. R. China

<sup>b</sup>Hefei National Laboratory of Physical Sciences at the Microscale & Department of Chemistry, University of Science and Technology of China (USTC), Hefei 230026, P. R. China

<sup>c</sup>School of Materials Science & Engineering, Jiangsu University, Zhenjiang 212013, P. R. China

\*E-mail: [junleewang@yahoo.com](mailto:junleewang@yahoo.com); [qyoung@ustc.edu.cn](mailto:qyoung@ustc.edu.cn).

#### Supplementary Figures S1-S5

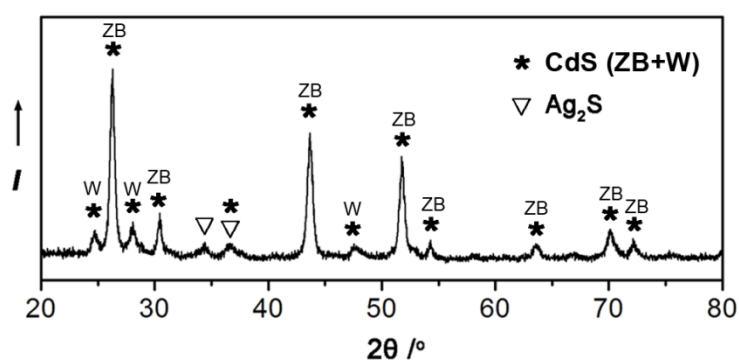

**Fig. S1** XRD pattern of Ag<sub>2</sub>S-CdS matchstick-shaped heteronanostructures prepared at the 1:4 Ag/Cd molar ratio.

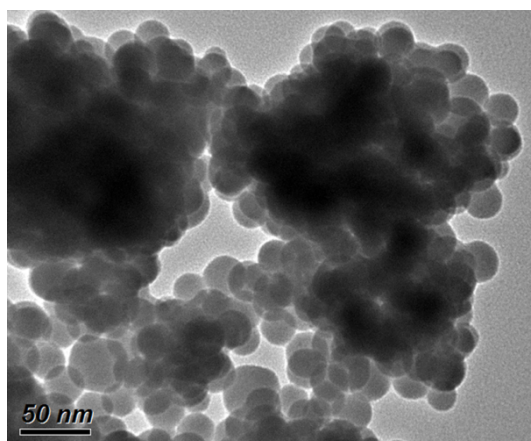

**Fig. S2** TEM image of pure Ag<sub>2</sub>S nanocrystals prepared from 1 mmol AgNO<sub>3</sub> and 2 mmol S powder at 160 °C for 60 min.

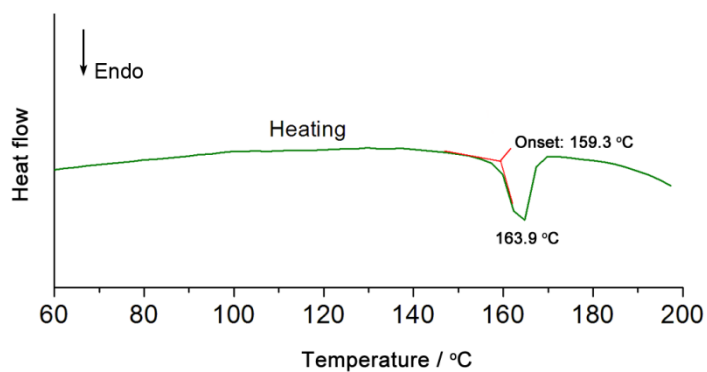

**Fig. S3** DSC heating curve of Ag<sub>2</sub>S-CdS matchstick-shaped heteronanostructures (prepared at the 1:2 Ag/Cd molar ratio) in the first DSC heating/cooling cycle (20 °C → 200 °C → 20 °C).

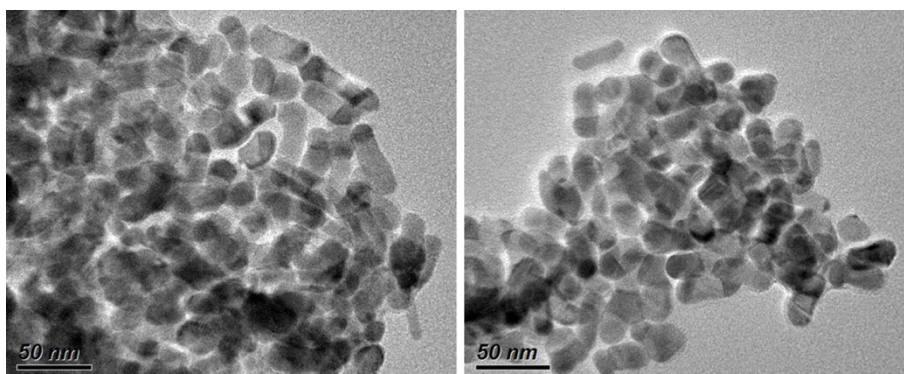

**Fig. S4** TEM images of Ag<sub>2</sub>S-CdS matchstick-shaped heteronanostructures (prepared at the 1:2 Ag/Cd molar ratio) after the first DSC heating/cooling cycle (20 °C → 200 °C → 20 °C).

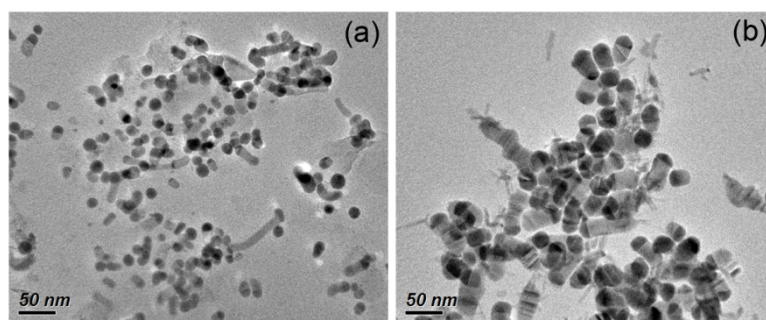

**Fig. S5** TEM images of the samples prepared at (a) 140 °C and (b) 180 °C from 1:2 molar ratio of Ag/Cd precursors. The isolated Ag<sub>2</sub>S nanoparticles and CdS thin nanorods were respectively observed in them.
